# Supplementary material for: Embryos and embryonic stem cells from the white rhinoceros
Source: Springer Nature journal article supplement (doi:10.1038/s41467-018-04959-2), 2018-06-27
Supplement: MOESM1 [file 41467_2018_4959_MOESM1_ESM.pdf › 41467_2018_4959_MOESM1_ESM.pdf]

## Supplementary Information

### Embryos and embryonic stem cells from the white rhinoceros

(Hildebrandt et al)

#### Histrelin stimulation protocol in fSWR

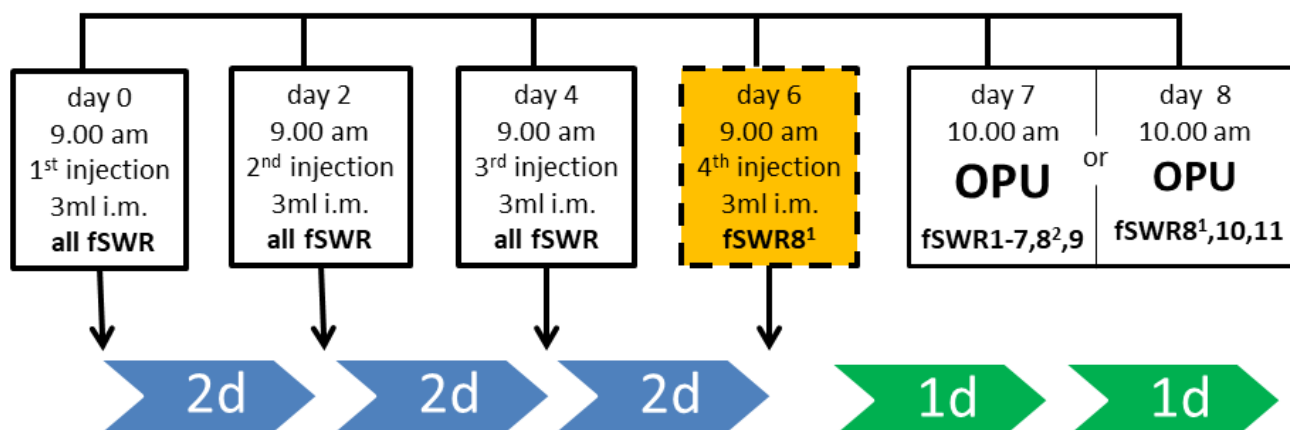

- BioRelease Histrelin 0.5 mg /ml produced by Bet Pharm LLC

#### Supplementary Figure 1. GnRH stimulation protocol in fSWR

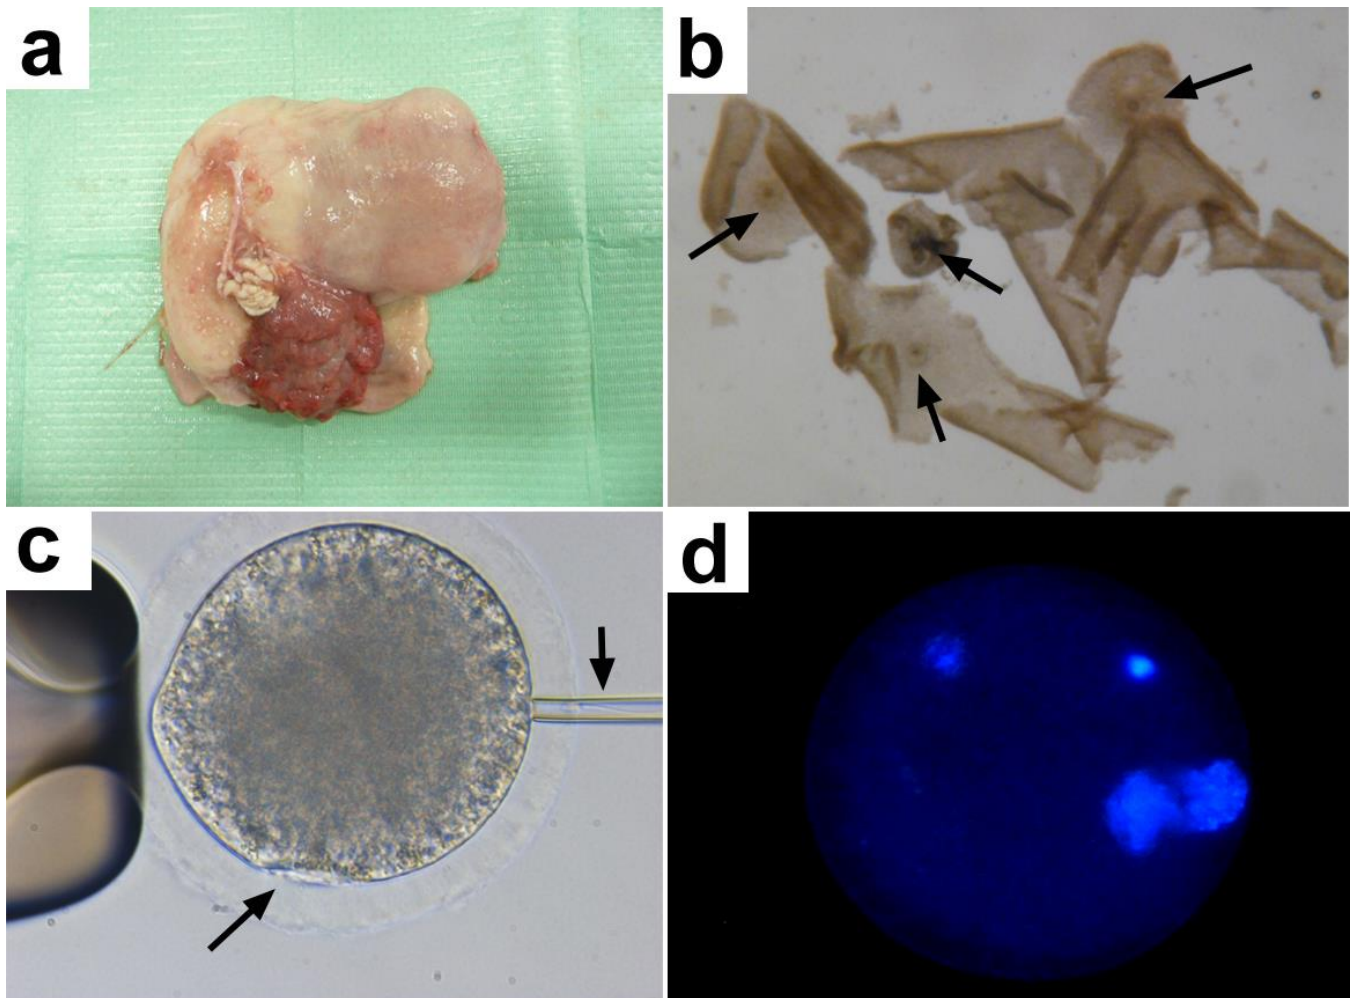

**Supplementary Figure 2. Oocytes collected from a natural deceased NWR aged female (32 years old).** One of the 2 ovaries pictured in **a**), very fibrotic with no follicles visible on the surface. **b**) after dissection and slicing of the ovaries few follicles were identified and 4 oocytes recovered, (arrows). **c**) one oocyte at the time of ICSI: the first polar body is visible at 6 o'clock (arrow) and the ICSI pipette with the sperm inside is at 3 o'clock (arrow). **d**) fixed oocyte 72 h after ICSI that did not cleave, 2 pronuclei and two polar bodies were visible after Hoechst staining and fluorescence microscopy.

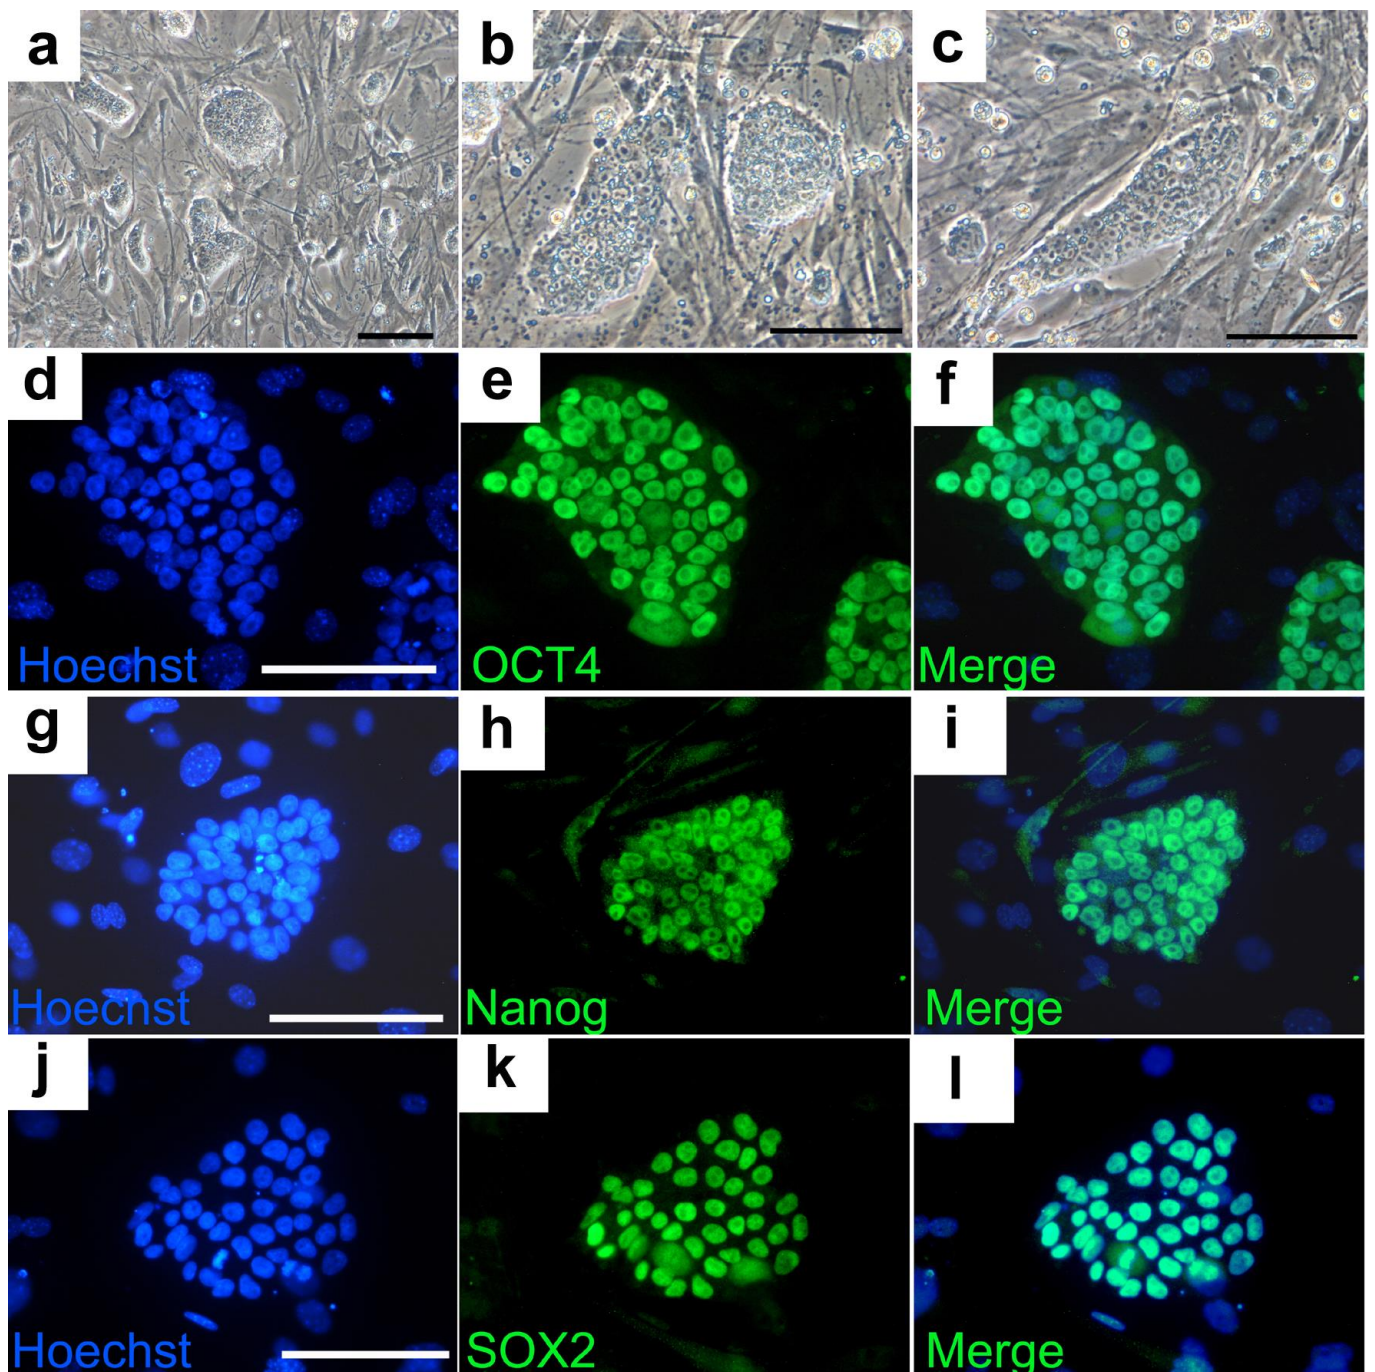

**Supplementary Figure 3. rESC phase contrast and immunocytochemistry for pluripotency markers at higher magnification (40x).** a) 20x and b, c) at 40x, phase contrast of growing colonies. d, e, f) staining for *OCT4*. g, h, i) staining for *NANOG*. j, k, l) staining for *SOX2*.

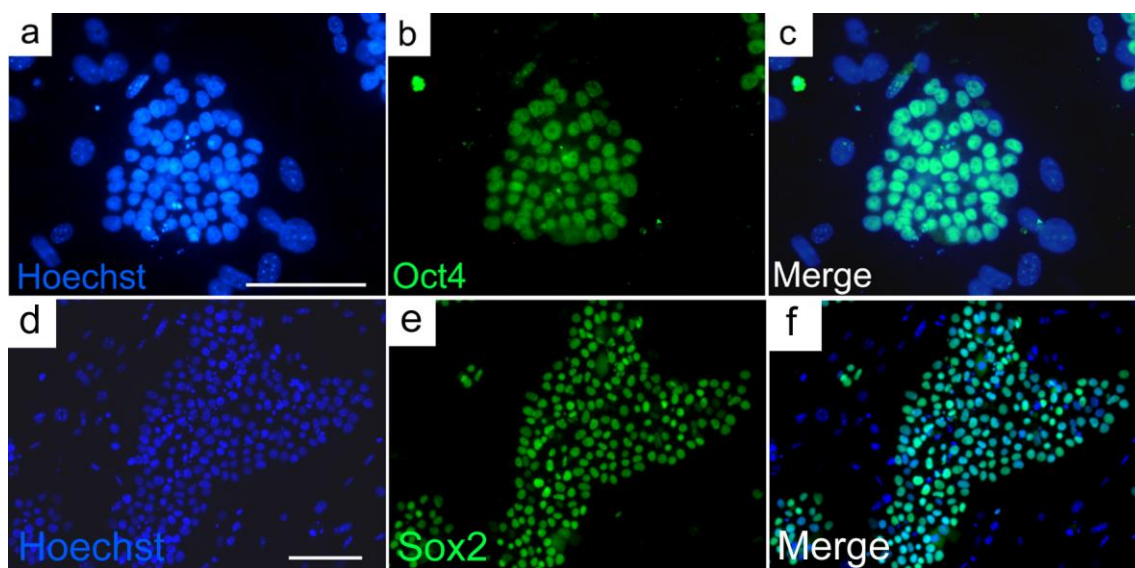

**Supplementary Figure 4:** Staining of rESC with monoclonal antibodies for pluripotency markers. **a, b, c)** *OCT4* (Mouse monoclonal, Santa Cruz, Oct3/4 sc-5279). **d, e, f)** *SOX2* (Mouse monoclonal, Thermofisher, MA-1-014)



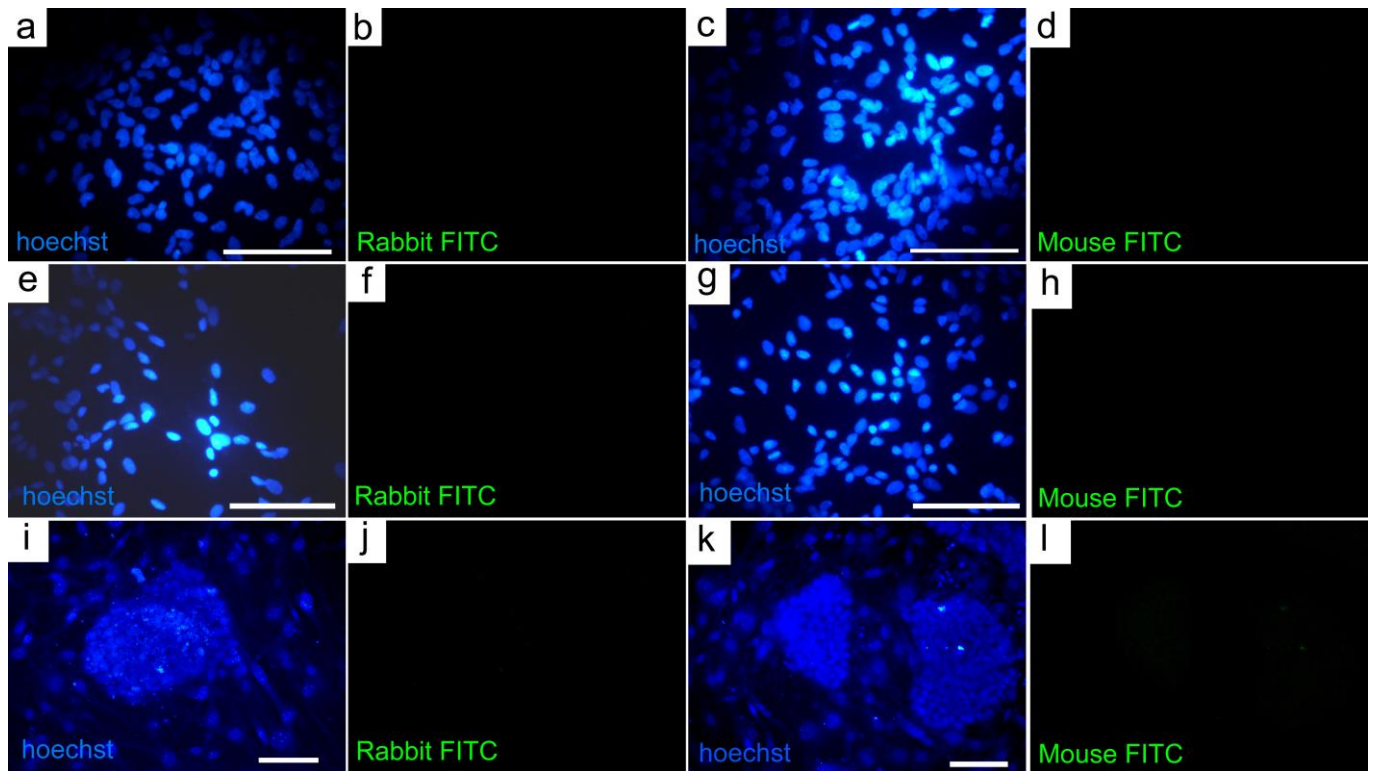

**Supplementary Figure 5. Negative controls of secondary antibodies.**

Following the same immunocytochemistry protocol, the primary antibodies (rabbit and mouse) were omitted. **a, b, c, d**) neural precursors; **e, f, g, h**) differentiated Neurons; **i, j, k, l**) undifferentiated rESC. It is clearly visible that no staining can be detected in the absence of the primary antibodies. Bar 100 $\mu$ m.

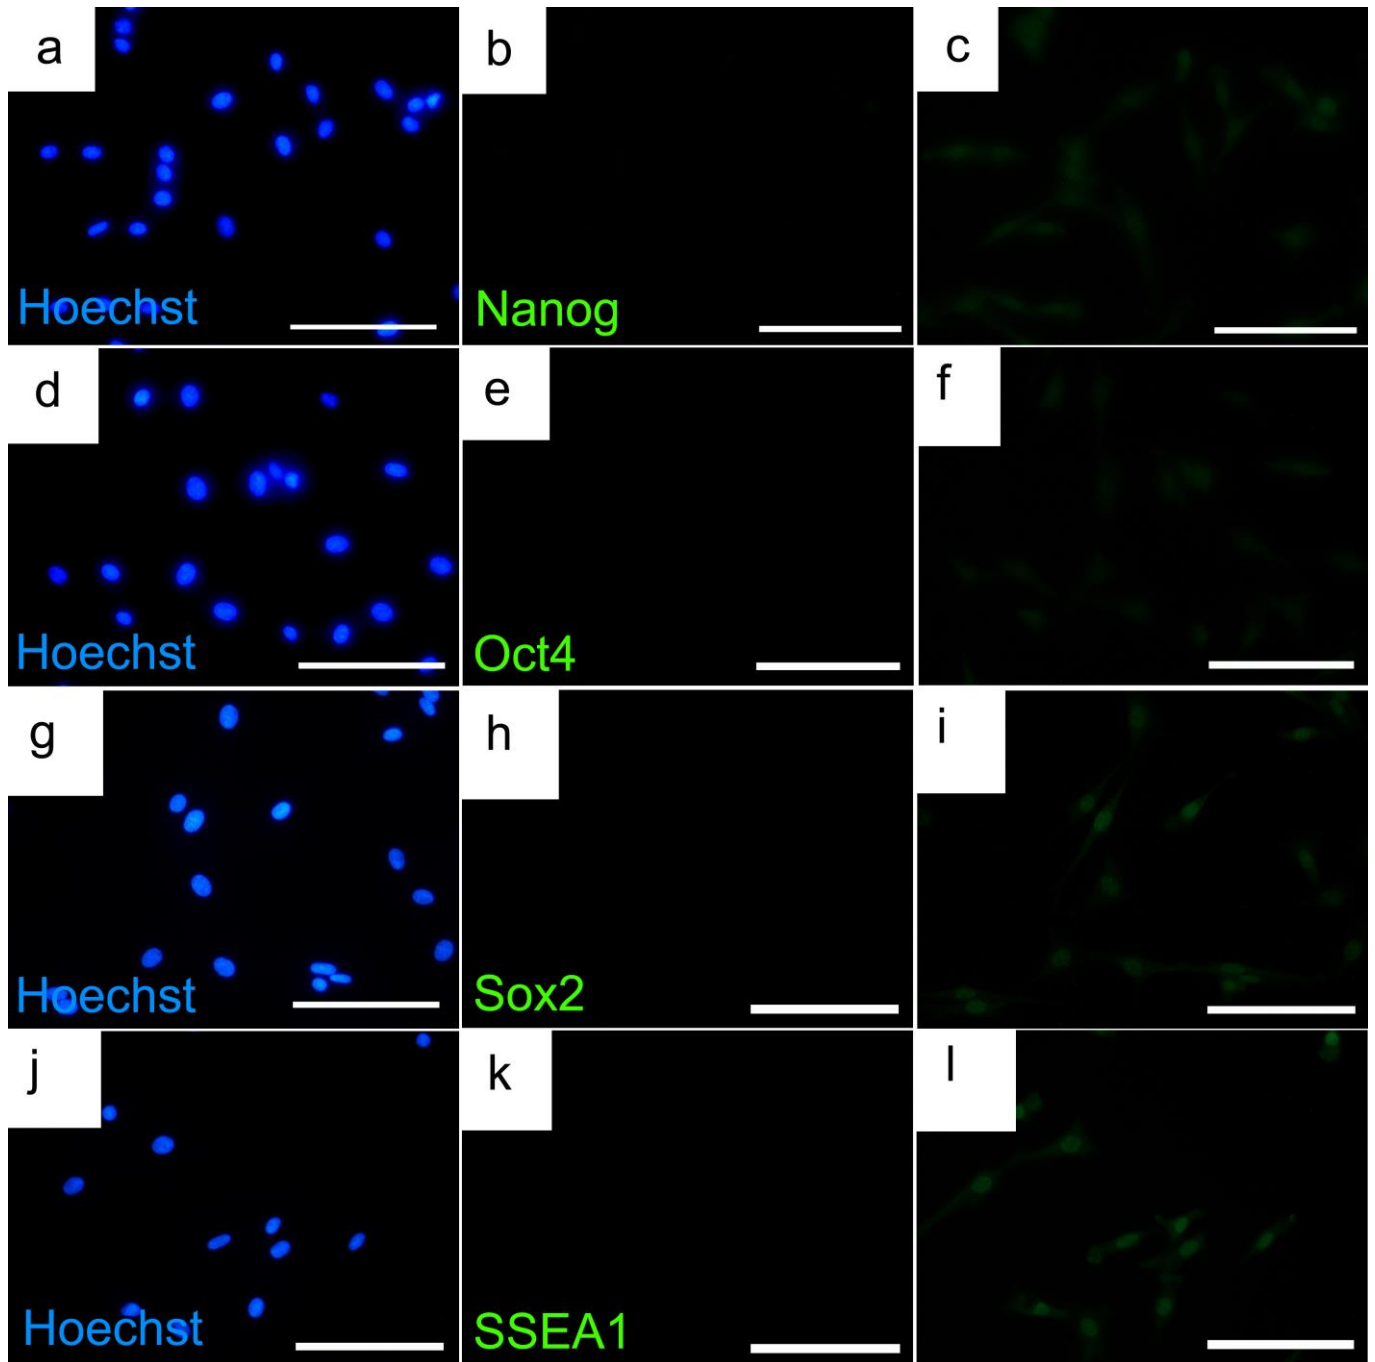

**Supplementary Figure 6. Fibroblast specificity controls.**

Rhino fibroblasts at passage 3 were plated on coverslips and then subjected to the same immunocytochemistry protocol used for the 4 undifferentiated markers to phenotype the two established rESC lines. **a, d, g, j)** Hoechst staining 0.5 seconds exposure; **b, e, h, k)** primary antibodies+ secondary antibodies 0.5 seconds exposure; **c, f, i, l)** 2 seconds exposure. It is clearly visible that the antibodies are not binding to fibroblasts. There is some weak staining in the overexposed picture (**l**) but SSEA1 should stain the surface of the cells and not the nucleus, so it is clearly background unspecific stain. Bar 100µm.

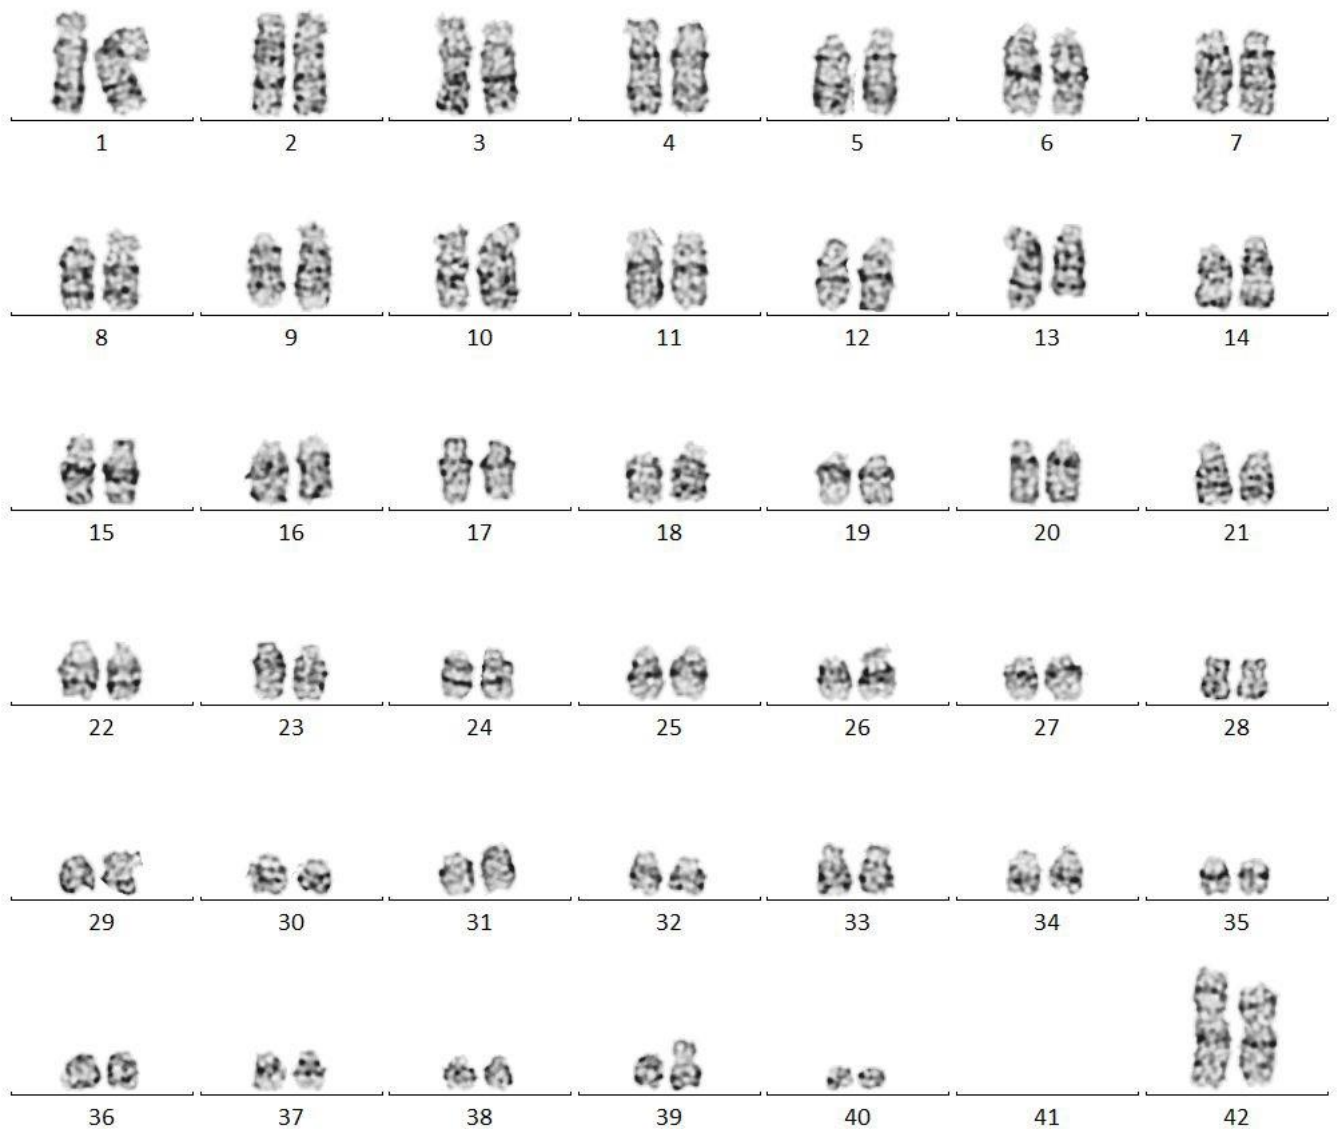

**Supplementary Figure 7.** Karyotype analysis of rESC. The analysis reveals the diploid female (sex Chr n 42 XX) status of the cell line analysed.

**Supplementary Table 1. Pig ICSI test of semen sample of NWR and SWR bulls**

| Name       | Breed    | Motility Post<br>Thaw (%) | Injected | Fixed/corr. fert.<br>Cleaved | %  |
|------------|----------|---------------------------|----------|------------------------------|----|
| mNWR1      | NWR      | <10                       | 24       | 9                            | 38 |
|            |          |                           | 24       | 13                           | 54 |
| mNWR1*     | NWR      | <10                       | 10       | 7                            | 70 |
|            |          |                           | 10       | 9                            | 90 |
| mNWR2      | NWR      | <10                       | 20       | 6                            | 30 |
|            |          |                           | 27       | 10                           | 37 |
| mNWR2*     | NWR      | <10                       | 10       | 9                            | 90 |
|            |          |                           | 9        | 6                            | 67 |
| mNWR3      | NWR      | 0                         | 10       | 1                            | 10 |
|            |          |                           | 10       | 1                            | 10 |
| mNWR3*     | NWR      | 0                         | 20       | 5                            | 25 |
|            |          |                           | 10       | 3                            | 30 |
| mSWR1      | SWR      | 40                        | 20       | 17                           | 85 |
|            |          |                           | 20       | 16                           | 80 |
| mSWR2      | SWR      | <10                       | 20       | 12                           | 60 |
|            |          |                           | 20       | 11                           | 55 |
| mSWR3      | SWR      | 20                        | 23       | 19                           | 83 |
|            |          |                           | 25       | 5                            | 20 |
| mSWR4      | SWR      | <10                       | 20       | 16                           | 80 |
|            |          |                           | 20       | 15                           | 75 |
| mSWR5      | SWR      | 40                        | 20       | 18                           | 90 |
|            |          |                           | 20       | 16                           | 80 |
| AOA** only | No Sperm | N.A.                      | 20       | 1                            | 5  |
|            |          |                           | 20       | 9***                         | 45 |

\* artificially activated

\*\* artificial oocyte activation

\*\*\* in this case embryos were cultured for 7 days but all arrested at cleavage stages



**Supplementary Table 2. Primers used for the RT-PCR**

| <b>Gene</b> | <b>Forward</b>         | <b>Reverse</b>       |
|-------------|------------------------|----------------------|
| SOX2        | AACCCCAAGATGCACAACCTC  | CGGGGCCGGTATTTATAATC |
| NANOG       | TCCAGCAGATGCAAGAAGCTTT | GCAAGTCTTTGGCCAGTTGT |
| OCT4        | GCAGCAGATCAGCCACATC    | CTCCCGTTGCGAATAGTCAT |
| 18SRNA      | GTAACCCGTTGAACCCCATC   | CCATCCAATCGGTAGTAGCG |

**Supplementary Table 3: Oligonucleotides for paternity testing**

| No | Oligo Name | Scale | Method      | Quality control | Purification | 5'-Mod. | Type | Sequence (5'-3')                |
|----|------------|-------|-------------|-----------------|--------------|---------|------|---------------------------------|
| 1  | 7B-F       | 40    | High Purity | Normal no extra | HPLC         | NONE    | DNA  | CCT CTG TGA TTA AGC AAG GC      |
| 2  | 7B-R       | 40    | High Purity | Normal no extra | HPLC         | HEX     | DNA  | ATG AAC AGG AAG GAA GAC GC      |
| 3  | 7C-F       | 40    | High Purity | Normal no extra | HPLC         | NONE    | DNA  | TGA ACT CTG ATG GAA ATG AG      |
| 4  | 7C-R       | 40    | High Purity | Normal no extra | HPLC         | HEX     | DNA  | AAC AGG TCT TGA TTA GTG C       |
| 5  | DB1-F      | 40    | High Purity | Normal no extra | HPLC         | NONE    | DNA  | AGA TAA TAA TAG GAC CCT GCT CCC |
| 6  | DB1-R      | 40    | High Purity | Normal no extra | HPLC         | HEX     | DNA  | GAG GGT TTA TTG TGA ATG AGG C   |
| 7  | DB44-F     | 40    | High Purity | Normal no extra | HPLC         | NONE    | DNA  | GGT GGA ATG TCA AGT AGC GG      |
| 8  | DB44-R     | 40    | High Purity | Normal no extra | HPLC         | HEX     | DNA  | CTT GTT GCC CCA TCC CTG         |
| 9  | DB49-F     | 40    | High Purity | Normal no extra | HPLC         | NONE    | DNA  | GTC AGG CAT TGG CAG GAA G       |
| 10 | BR6-F      | 40    | High Purity | Normal no extra | HPLC         | NONE    | DNA  | TCA TTT CTT TGT TCC CCA TAG CAC |
| 11 | Rh7-F      | 40    | High Purity | Normal no extra | HPLC         | NONE    | DNA  | CCG TCA CAT ATG ACA GTG TGC     |
| 12 | Rh9-F      | 40    | High Purity | Normal no extra | HPLC         | NONE    | DNA  | TCT GGT ACC ACC AAA TGT AGC     |
| 13 | WR1-F      | 40    | High Purity | Normal no extra | HPLC         | NONE    | DNA  | GGC AAA ACT AAG AGA ACT TG      |
| 14 | WR2-F      | 40    | High Purity | Normal no extra | HPLC         | NONE    | DNA  | ACA GCT AGA ATC ACC AAA AC      |
| 15 | DB49-R     | 40    | High Purity | Normal no extra | HPLC         | HEX     | DNA  | CAG GGT AAG TGG GGG TGC         |
| 16 | BR6-R      | 40    | High Purity | Normal no extra | HPLC         | HEX     | DNA  | AGC AAT ATC CAC GAT ATG TGA AGG |
| 17 | Rh7-R      | 40    | High Purity | Normal no extra | HPLC         | HEX     | DNA  | GGG CAG CTT ATG CTC AAG TC      |
| 18 | Rh9-R      | 40    | High Purity | Normal no extra | HPLC         | FAM     | DNA  | ACG ATT ACG TCT TTC AGT TGC     |
| 19 | WR1-R      | 40    | High Purity | Normal no extra | HPLC         | FAM     | DNA  | GAT ACC AAA CTG GAA ATG G       |
| 20 | WR2-R      | 40    | High Purity | Normal no extra | HPLC         | FAM     | DNA  | TCC TGC TGC ATA AAT CTC         |

**Supplementary Table 4: Oligonucleotides for sex determination**

| No | Oligo Name | Scale | Method      | Quality control | Purification | 5'-Mod. | Type | Sequence (5'-3')              |
|----|------------|-------|-------------|-----------------|--------------|---------|------|-------------------------------|
| 1  | ARZF1_f    | 40    | High Purity | Normal no extra | HPLC         | FAM     | DNA  | GAT TTG GAA SCT AGG CAT TTC C |
| 2  | ARZF1_r    | 40    | High Purify | Normal no extra | HPLC         | NONE    | DNA  | GCC ATG ATA CTC ATG AAT GAC A |

**Supplementary Table 5. Microsatellite analysis to confirm the parental origin and the sex of the embryos produced.** 051A, 051B 240A and 240B are the cell derived from the corresponding 4 embryos

| marker | SWR   |     | SWR   |     | SWR  |     | x | SWR  |     | NWR   |     | SWR   |     | x   | SWR  |     |      |   |
|--------|-------|-----|-------|-----|------|-----|---|------|-----|-------|-----|-------|-----|-----|------|-----|------|---|
|        | mSWR1 |     | fSWR5 |     | 051A |     |   | 051B |     | mNWR2 |     | fSWR5 |     |     | 240A |     | 240B |   |
|        | 1     | 2   | 1     | 2   | 1    | 2   |   | 1    | 2   | 1     | 2   | 1     | 2   |     | 1    | 2   | 1    | 2 |
| 7B     | 260   | 260 | 260   | 260 | 260  | 260 |   | 260  | 260 | 260   | 260 | 260   | 260 |     | 260  | 260 |      |   |
| 7C     | 251   | 253 | 251   | 251 | 251  | 253 |   | 251  | 253 | 249   | 251 | 251   | 251 | 249 | 251  | 249 | 251  |   |
| BR6    | 133   | 154 | 133   | 154 | 133  | 154 |   | 133  | 154 | 126   | 126 | 133   | 154 | 126 | 133  | 126 | 154  |   |
| DB1    | 130   | 130 | 130   | 130 | 130  | 130 |   | 130  | 130 | 123   | 127 | 130   | 130 | 127 | 130  | 123 | 130  |   |
| DB44   | 167   | 175 | 169   | 169 | 167  | 169 |   | 169  | 169 | 179   | 181 | 169   | 169 | 169 | 179  | 169 | 181  |   |
| DB49   | 158   | 161 | 158   | 161 | 161  | 161 |   | 158  | 161 | 163   | 163 | 158   | 161 | 161 | 163  | 158 | 163  |   |
| RH7    | 193   | 193 | 193   | 193 | 193  | 193 |   | 193  | 193 | 193   | 193 | 193   | 193 | 193 | 193  | 193 | 193  |   |
| RH9    | 136   | 138 | 136   | 138 | 136  | 136 |   | 138  | 138 | 136   | 148 | 136   | 138 | 136 | 136  | 138 | 148  |   |
| WR1    | 178   | 188 | 178   | 188 | 178  | 178 |   | 178  | 188 | 182   | 188 | 178   | 188 | 182 | 188  | 188 | 188  |   |
| WR2    | 225   | 225 | 225   | 239 | 225  | 239 |   | 225  | 239 | 235   | 235 | 225   | 239 | 225 | 235  | 235 | 239  |   |
| ARZF1  | 96    | 103 | 96    | 96  | 96   | 96  |   | 96   | 96  | 96    | 103 | 96    | 96  | 96  | 96   | 96  | 103  |   |
|        | m     |     | f     |     | f    |     |   | f    |     | m     |     | f     |     | f   |      | m   |      |   |
