# Supplementary material for: Embryos and embryonic stem cells from the white rhinoceros
Source: Springer Nature journal article supplement (doi:10.1038/s41467-018-04959-2), 2018-06-27
Supplement: MOESM3 [file 41467_2018_4959_MOESM3_ESM.pdf › 41467_2018_4959_MOESM3_ESM.pdf]

## **Description of Additional Supplementary Files**

**File Name:** Supplementary Movie 1

**Description:** Beating cardiomyocytes obtained from direct differentiation in vitro of rES cell
